# Supplementary material
Source: PubMed Central journal article supplement (PMC11072756)
Supplement: 18_2021_3953_MOESM1_ESM.pdf [file 18_2021_3953_MOESM1_ESM.pdf]

**Supplemental materials** for the manuscript

**The Na<sup>+</sup>-activated K<sup>+</sup> channel Slack contributes to synaptic development and plasticity**

Lucas Matt<sup>1,\*</sup>, Thomas Pham<sup>1</sup>, David Skrabak<sup>1</sup>, Felix Hoffmann<sup>1,2</sup>, Philipp Eckert<sup>1</sup>, Jiaqi Yin<sup>1</sup>, Miriam Gisevius<sup>1</sup>, Rebekka Ehinger<sup>1</sup>, Anne Bausch<sup>1</sup>, Marius Ueffing<sup>2</sup>, Karsten Boldt<sup>2</sup>, Peter Ruth<sup>1</sup>, Robert Lukowski<sup>1,\*</sup>

<sup>1</sup> Department of Pharmacology, Toxicology and Clinical Pharmacy, Institute of Pharmacy, University of Tübingen, 72076 Tübingen, Germany

<sup>2</sup> Institute for Ophthalmic Research, Molecular Biology of Retinal Degenerations and Medical Bioanalysis, University of Tübingen, 72076 Tübingen, Germany

\*Co-corresponding authors: Lucas Matt, email: lucas.matt@uni-tuebingen.de; Robert Lukowski, email: robert.lukowski@uni-tuebingen.de.

**Abbreviated title:** Slack in synaptic plasticity

**SUPPLEMENTAL TABLES**

**Table S1. Values and statistics for Figure 1.**

| panel    |                      |                                |                                |                         |                                        |                                 |
|----------|----------------------|--------------------------------|--------------------------------|-------------------------|----------------------------------------|---------------------------------|
| <b>A</b> | <b>genotype</b>      | <b>baseline (%-baseline)</b>   | <b>stimulated (%-baseline)</b> | <b>n (slice/animal)</b> | <b>Statistics</b>                      | <b>p</b>                        |
|          | Slack <sup>+/+</sup> | 100.2 ± 0.2                    | 68.9 ± 0.2                     | 10/5                    | F <sub>3,36</sub> = 12.3               | <0.001 vs. baseline             |
|          | Slack <sup>-/-</sup> | 99.8 ± 0.2                     | 96.9 ± 7.3                     | 10/4                    |                                        | <0.001 vs. Slack <sup>+/+</sup> |
| <b>B</b> | Slack <sup>+/+</sup> | 99.7 ± 0.7                     | 159.4 ± 11.9                   | 13/8                    | F <sub>3,40</sub> = 17.2               | <0.001 vs. baseline             |
|          | Slack <sup>-/-</sup> | 99.9 ± 0.3                     | 107.5 ± 4.6                    | 9/4                     |                                        | <0.001 vs. Slack <sup>+/+</sup> |
| <b>C</b> | <b>genotype</b>      | <b>stimulus intensity (µA)</b> | <b>Slope (mV/ms)</b>           | <b>n (slice/animal)</b> | <b>Statistics</b>                      | <b>p</b>                        |
|          | Slack <sup>+/+</sup> | 25                             | -0.037 ± 0.003                 | 12/4                    | n.s.                                   |                                 |
|          |                      | 50                             | -0.047 ± 0.004                 |                         |                                        |                                 |
|          |                      | 75                             | -0.105 ± 0.013                 |                         |                                        |                                 |
|          |                      | 100                            | -0.167 ± 0.023                 |                         |                                        |                                 |
|          |                      | 125                            | -0.193 ± 0.025                 |                         |                                        |                                 |
|          | Slack <sup>-/-</sup> | 25                             | -0.035 ± 0.008                 | 7/3                     |                                        |                                 |
|          |                      | 50                             | -0.041 ± 0.003                 |                         |                                        |                                 |
|          |                      | 75                             | -0.088 ± 0.012                 |                         |                                        |                                 |
|          |                      | 100                            | -0.135 ± 0.024                 |                         |                                        |                                 |
|          |                      | 125                            | -0.150 ± 0.030                 |                         |                                        |                                 |
|          |                      | 150                            | -0.175 ± 0.037                 |                         |                                        |                                 |
| <b>E</b> | <b>genotype</b>      | <b>τ decay (ms)</b>            | <b>n</b>                       | <b>statistics</b>       |                                        | <b>p</b>                        |
|          | Slack <sup>+/+</sup> | 6.8 ± 0.6                      | 12                             | unpaired t-test         |                                        |                                 |
|          | Slack <sup>-/-</sup> | 10.1 ± 0.9                     | 8                              |                         | <0.01 vs. Slack <sup>+/+</sup>         |                                 |
| <b>F</b> | <b>genotype</b>      | <b>stimulus intensity (µA)</b> | <b>Slope (mV/ms)</b>           | <b>n (slice/animal)</b> | <b>Statistics</b>                      | <b>p</b>                        |
|          | Slack <sup>+/+</sup> | 25                             | -0.032 ± 0.004                 | 18/3                    | F <sub>1,150</sub> = 23.2<br>p < 0.001 |                                 |
|          |                      | 50                             | -0.064 ± 0.010                 |                         |                                        |                                 |
|          |                      | 75                             | -0.118 ± 0.017                 |                         |                                        |                                 |
|          |                      | 100                            | -0.151 ± 0.023                 |                         |                                        |                                 |
|          |                      | 125                            | -0.178 ± 0.026                 |                         |                                        |                                 |
|          | Slack <sup>-/-</sup> | 25                             | -0.032 ± 0.004                 | 9/2                     |                                        |                                 |
|          |                      | 50                             | -0.04 ± 0.005                  |                         |                                        |                                 |
|          |                      | 75                             | -0.058 ± 0.008                 |                         |                                        |                                 |
|          |                      | 100                            | -0.074 ± 0.013                 |                         |                                        |                                 |
|          |                      | 125                            | -0.084 ± 0.015                 |                         |                                        |                                 |
|          |                      | 150                            | -0.086 ± 0.017                 |                         |                                        |                                 |
| <b>H</b> | <b>genotype</b>      | <b>τ decay (ms)</b>            | <b>n</b>                       | <b>statistics</b>       |                                        | <b>p</b>                        |
|          | Slack <sup>+/+</sup> | 9.5 ± 1.3                      | 18                             | unpaired t-test         |                                        |                                 |
|          | Slack <sup>-/-</sup> | 39.1 ± 6.6                     | 9                              |                         | <0.001 vs. Slack <sup>+/+</sup>        |                                 |
| <b>J</b> | <b>genotype</b>      | <b>baseline (%-baseline)</b>   | <b>stimulated (%-baseline)</b> | <b>n (slice/animal)</b> | <b>Statistics</b>                      | <b>p</b>                        |
|          | Slack <sup>+/+</sup> | 99.9 ± 1.0                     | 63.4 ± 4.7                     | 8/2                     | F <sub>3,32</sub> = 21.09<br>p < 0.001 | <0.001 vs. baseline             |
|          | Slack <sup>-/-</sup> | 99.5 ± 0.5                     | 92.2 ± 5.2                     | 10/3                    |                                        | <0.001 vs. Slack <sup>+/+</sup> |

**Table S2. Values and statistics for Figure 2.**

| panel    |                      |                      |                                |                            |                               |                                |
|----------|----------------------|----------------------|--------------------------------|----------------------------|-------------------------------|--------------------------------|
| <b>A</b> | <b>protein</b>       | <b>n</b>             | <b>statistics</b>              | <b>age (d)</b>             | <b>p</b>                      |                                |
|          | GluN1                | 3-4                  | $F_{(1,28)} = 3.5$             |                            |                               |                                |
|          | GluN2A               | 3-4                  | $F_{(1,29)} = 1.9$             | 14                         | 0.04                          |                                |
|          | GluN2B               | 3-4                  | $F_{(1,26)} = 90.3, p < 0.001$ | 1                          | <0.001                        |                                |
|          |                      |                      |                                | 7                          | <0.001                        |                                |
|          |                      |                      | 14                             | <0.001                     |                               |                                |
| GluN3A   | 5-8                  | $F_{(1,42)} = 1.7$   |                                | 1                          | <0.001                        |                                |
| <b>B</b> | GluA1                | 3                    | $F_{(1,19)} = 52.6, p < 0.001$ | 21                         | <0.001                        |                                |
|          |                      |                      |                                | 28                         | 0.003                         |                                |
|          | GluA2                | 3                    | $F_{(1,18)} = 0.26$            |                            |                               |                                |
|          | GluA3                | 3                    | $F_{(1,19)} = 6.7, p = 0.02$   | 21                         | <0.001                        |                                |
|          | GluA4                | 3                    | $F_{(1,19)} = 1.3$             |                            |                               |                                |
| <b>D</b> | <b>fraction</b>      | <b>protein</b>       | <b>genotype</b>                | <b>relative expression</b> | <b>n</b>                      | <b>p</b>                       |
|          | synaptosomes         | GluN1                | Slack <sup>+/+</sup>           | $0.070 \pm 0.026$          | 3                             |                                |
|          |                      |                      | Slack <sup>-/-</sup>           | $0.043 \pm 0.018$          |                               |                                |
|          |                      | GluN2A               | Slack <sup>+/+</sup>           | $0.013 \pm 0.003$          | 3                             |                                |
|          |                      |                      | Slack <sup>-/-</sup>           | $0.016 \pm 0.006$          |                               |                                |
|          |                      | GluN2B               | Slack <sup>+/+</sup>           | $0.128 \pm 0.050$          | 11                            |                                |
|          |                      |                      | Slack <sup>-/-</sup>           | $0.095 \pm 0.029$          |                               |                                |
|          | GluN3A               | Slack <sup>+/+</sup> | $0.054 \pm 0.010$              | 5                          |                               |                                |
|          |                      | Slack <sup>-/-</sup> | $0.037 \pm 0.011$              |                            |                               |                                |
|          | PSD                  | GluN1                | Slack <sup>+/+</sup>           | $0.716 \pm 0.327$          | 3                             |                                |
|          |                      |                      | Slack <sup>-/-</sup>           | $0.496 \pm 0.302$          |                               |                                |
|          |                      | GluN2A               | Slack <sup>+/+</sup>           | N.A.                       | N.A.                          |                                |
|          |                      |                      | Slack <sup>-/-</sup>           | N.A.                       |                               |                                |
|          |                      | GluN2B               | Slack <sup>+/+</sup>           | $1.079 \pm 0.281$          | 8                             |                                |
|          |                      |                      | Slack <sup>-/-</sup>           | $0.675 \pm 0.176$          |                               | 0.017 vs. Slack <sup>+/+</sup> |
| GluN3A   | Slack <sup>+/+</sup> | $0.129 \pm 0.042$    | 5                              |                            |                               |                                |
|          | Slack <sup>-/-</sup> | $0.097 \pm 0.012$    |                                |                            |                               |                                |
| <b>E</b> | synaptosomes         | GluA1                | Slack <sup>+/+</sup>           | $0.192 \pm 0.052$          | 3                             |                                |
|          |                      |                      | Slack <sup>-/-</sup>           | $0.109 \pm 0.017$          |                               |                                |
|          |                      | GluA2                | Slack <sup>+/+</sup>           | $1.027 \pm 0.688$          | 3                             |                                |
|          |                      |                      | Slack <sup>-/-</sup>           | $0.716 \pm 0.348$          |                               |                                |
|          | PSD-95               | Slack <sup>+/+</sup> | $0.36 \pm 0.138$               | 7                          |                               |                                |
|          |                      | Slack <sup>-/-</sup> | $0.335 \pm 0.13$               |                            |                               |                                |
|          | PSD                  | GluA1                | Slack <sup>+/+</sup>           | $0.329 \pm 0.063$          | 3                             |                                |
|          |                      |                      | Slack <sup>-/-</sup>           | $0.145 \pm 0.010$          |                               |                                |
|          |                      | GluA2                | Slack <sup>+/+</sup>           | $3.747 \pm 0.758$          | 3                             |                                |
|          |                      |                      | Slack <sup>-/-</sup>           | $4.887 \pm 1.488$          |                               |                                |
| PSD-95   |                      | Slack <sup>+/+</sup> | $0.998 \pm 0.268$              | 7                          |                               |                                |
|          |                      | Slack <sup>-/-</sup> | $2.051 \pm 0.664$              |                            | 0.046 vs Slack <sup>+/+</sup> |                                |

**Table S3. Values and statistics for Figure 3.**

| panel |                      |                 |                   |                                  |                                |
|-------|----------------------|-----------------|-------------------|----------------------------------|--------------------------------|
| C     | genotype             | stim            | AUC<br>(R/R0 x s) | n<br>(recordings/cultures/cells) | p                              |
|       | Slack <sup>+/+</sup> | 1 <sup>st</sup> | 0.325 ± 0.027     | 6/2/90                           |                                |
|       |                      | 2 <sup>nd</sup> | 0.093 ± 0.012     |                                  |                                |
|       | Slack <sup>-/-</sup> | 1 <sup>st</sup> | 0.511 ± 0.095     | 6/3/96                           | 0.097 vs Slack <sup>+/+</sup>  |
|       |                      | 2 <sup>nd</sup> | 0.259 ± 0.046     |                                  | < 0.01 vs Slack <sup>+/+</sup> |

**Table S4. Values and statistics for Figure 4.**

| panel    |                      |                             |                           |                        |                        |                                |
|----------|----------------------|-----------------------------|---------------------------|------------------------|------------------------|--------------------------------|
| <b>A</b> | genotype             | pS845/GluA1<br>unstimulated | pS845/GluA1<br>stimulated | n                      | statistics             | p                              |
|          | Slack <sup>+/+</sup> | 0.35 ± 0.06                 | 0.11 ± 0.01               | 3                      | F <sub>1,8</sub> = 1.0 | 0.04 vs. unstim.               |
|          | Slack <sup>-/-</sup> | 0.30 ± 0.01                 | 0.28 ± 0.07               |                        |                        |                                |
| <b>B</b> | genotype             | pS831/GluA1<br>unstimulated | pS831/GluA1<br>stimulated | n                      | statistics             | p                              |
|          | Slack <sup>+/+</sup> | 0.61 ± 0.07                 | 0.59 ± 0.03               | 3                      | F <sub>1,8</sub> = 1.1 |                                |
|          | Slack <sup>-/-</sup> | 0.61 ± 0.02                 | 0.94 ± 0.33               |                        |                        |                                |
| <b>D</b> | fraction             | protein                     | genotype                  | relative<br>expression | n                      | p                              |
|          | synaptosomes         | Rab4                        | Slack <sup>+/+</sup>      | 0.187 ± 0.049          | 5                      | 0.029 vs. Slack <sup>+/+</sup> |
|          |                      |                             | Slack <sup>-/-</sup>      | 0.279 ± 0.048          |                        |                                |

**Table S5. Values and statistics for Figure 5.**

| panel    |                      |                                |                                |                         |                                      |                                  |
|----------|----------------------|--------------------------------|--------------------------------|-------------------------|--------------------------------------|----------------------------------|
| <b>A</b> | <b>genotype</b>      | <b>baseline (%-baseline)</b>   | <b>stimulated (%-baseline)</b> | <b>n (slice/animal)</b> | <b>statistics</b>                    | <b>p</b>                         |
|          | Slack <sup>+/+</sup> | 100.3 ± 0.3                    | 82.5 ± 3.9                     | 6/3                     | F <sub>3,22</sub> = 11.0             | < 0.001 vs. baseline             |
|          | Slack <sup>-/-</sup> | 100 ± 0.02                     | 104.7 ± 2.7                    | 7/3                     |                                      | < 0.001 vs. Slack <sup>+/+</sup> |
| <b>B</b> | Slack <sup>+/+</sup> | 99.6 ± 1.5                     | 184.6 ± 22.6                   | 6/4                     | F <sub>3,28</sub> = 8.1              | < 0.01 vs. baseline              |
|          | Slack <sup>-/-</sup> | 100.0 ± 0.1                    | 162.1 ± 16.2                   | 10/3                    |                                      | < 0.01 vs. baseline              |
| <b>C</b> | <b>genotype</b>      | <b>stimulus intensity (µA)</b> | <b>Slope (mV/ms)</b>           | <b>n (slice/animal)</b> | <b>statistics</b>                    | <b>p</b>                         |
|          | Slack <sup>+/+</sup> | 25                             | -0.02 ± 0.02                   | 18/9                    |                                      |                                  |
|          |                      | 50                             | -0.12 ± 0.02                   |                         |                                      |                                  |
|          |                      | 75                             | -0.33 ± 0.05                   |                         |                                      |                                  |
|          |                      | 100                            | -0.53 ± 0.08                   |                         |                                      |                                  |
|          |                      | 125                            | -0.74 ± 0.12                   |                         |                                      |                                  |
|          | Slack <sup>-/-</sup> | 25                             | -0.004 ± 0.008                 | 14/3                    |                                      |                                  |
|          |                      | 50                             | -0.13 ± 0.03                   |                         |                                      |                                  |
|          |                      | 75                             | -0.39 ± 0.07                   |                         |                                      |                                  |
|          |                      | 100                            | -0.59 ± 0.08                   |                         |                                      |                                  |
|          |                      | 125                            | -0.75 ± 0.09                   |                         |                                      |                                  |
|          |                      | 150                            | -0.86 ± 0.11                   |                         |                                      |                                  |
| <b>E</b> | <b>genotype</b>      | <b>τ decay (ms)</b>            | <b>n</b>                       | <b>statistics</b>       |                                      |                                  |
|          | Slack <sup>+/+</sup> | 11.8 ± 0.4                     | 14                             |                         |                                      |                                  |
|          | Slack <sup>-/-</sup> | 10.7 ± 0.5                     | 10                             |                         |                                      |                                  |
| <b>F</b> | <b>genotype</b>      | <b>stimulus intensity (µA)</b> | <b>Slope (mV/ms)</b>           | <b>n (slice/animal)</b> | <b>statistics</b>                    | <b>p</b>                         |
|          | Slack <sup>+/+</sup> | 25                             | -0.001 ± 0.002                 | 17/9                    | F <sub>1,238</sub> = 8.4             |                                  |
|          |                      | 50                             | -0.023 ± 0.005                 |                         |                                      |                                  |
|          |                      | 75                             | -0.070 ± 0.014                 |                         |                                      |                                  |
|          |                      | 100                            | -0.124 ± 0.024                 |                         |                                      |                                  |
|          |                      | 125                            | -0.169 ± 0.030                 |                         |                                      |                                  |
|          | Slack <sup>-/-</sup> | 150                            | -0.193 ± 0.033                 | 16/4                    |                                      |                                  |
|          |                      | 25                             | -0.001 ± 0.002                 |                         |                                      |                                  |
|          |                      | 50                             | -0.022 ± 0.007                 |                         |                                      |                                  |
|          |                      | 75                             | -0.074 ± 0.013                 |                         |                                      |                                  |
|          |                      | 100                            | -0.127 ± 0.016                 |                         |                                      |                                  |
|          |                      | 125                            | -0.196 ± 0.027                 |                         |                                      |                                  |
|          | 150                  | -0.234 ± 0.034                 |                                |                         |                                      |                                  |
| <b>H</b> | <b>genotype</b>      | <b>τ decay (ms)</b>            | <b>n</b>                       | <b>statistics</b>       | <b>p</b>                             |                                  |
|          | Slack <sup>+/+</sup> | 18.1 ± 1.1                     | 8                              | unpaired t-test         | 0.0105 vs. Slack <sup>+/+</sup>      |                                  |
|          | Slack <sup>-/-</sup> | 26.1 ± 2.3                     | 10                             |                         |                                      |                                  |
| <b>J</b> | <b>genotype</b>      | <b>baseline (%-baseline)</b>   | <b>stimulated (%-baseline)</b> | <b>n (slice/animal)</b> | <b>Statistics</b>                    | <b>p</b>                         |
|          | Slack <sup>+/+</sup> | 99.9 ± 0.2                     | 84.3 ± 4.5                     | 7/4                     | F <sub>3,28</sub> = 3.53<br>p = 0.03 | 0.04 vs. baseline                |
|          | Slack <sup>-/-</sup> | 100.1 ± 0.04                   | 91.1 ± 6.0                     | 9/3                     |                                      | 0.26 vs. baseline                |

**Table S6. Values and statistics for Figure 6.**

| panel                |                      |                          |                        |                     |                           |                  |
|----------------------|----------------------|--------------------------|------------------------|---------------------|---------------------------|------------------|
| <b>B</b>             | fraction             | protein                  | genotype               | relative expression | n                         | p                |
|                      | synaptosomes         | GluN2B                   | Slack <sup>+/+</sup>   | 0.17 ± 0.15         | 3                         |                  |
|                      |                      |                          | Slack <sup>-/-</sup>   | 0.13 ± 0.11         |                           |                  |
|                      |                      | GluA2                    | Slack <sup>+/+</sup>   | 0.33 ± 0.043        | 3                         |                  |
|                      |                      |                          | Slack <sup>-/-</sup>   | 0.32 ± 0.012        |                           |                  |
|                      |                      | PSD-95                   | Slack <sup>+/+</sup>   | 0.36 ± 0.12         | 3                         |                  |
|                      |                      |                          | Slack <sup>-/-</sup>   | 0.41 ± 0.094        |                           |                  |
|                      |                      | Rab4                     | Slack <sup>+/+</sup>   | 0.44 ± 0.20         | 5                         |                  |
|                      |                      |                          | Slack <sup>-/-</sup>   | 0.39 ± 0.14         |                           |                  |
|                      | PSD                  | GluN2B                   | Slack <sup>+/+</sup>   | 1.0 ± 0.30          | 3                         |                  |
|                      |                      |                          | Slack <sup>-/-</sup>   | 1.1 ± 0.59          |                           |                  |
|                      |                      | GluA2                    | Slack <sup>+/+</sup>   | 0.36 ± 0.17         | 3                         |                  |
|                      |                      |                          | Slack <sup>-/-</sup>   | 0.63 ± 0.25         |                           |                  |
|                      |                      | PSD-95                   | Slack <sup>+/+</sup>   | 3.1 ± 1.1           | 3                         |                  |
|                      |                      |                          | Slack <sup>-/-</sup>   | 2.2 ± 0.57          |                           |                  |
|                      |                      | Rab4                     | Slack <sup>+/+</sup>   | N.A.                | 3                         |                  |
| Slack <sup>-/-</sup> |                      |                          | N.A.                   |                     |                           |                  |
| <b>C</b>             | genotype             | pS845/GluA1 unstimulated | pS845/GluA1 stimulated | n                   | statistics                | p                |
|                      | Slack <sup>+/+</sup> | 0.10 ± 0.02              | 0.04 ± 0.01            | 4                   | F <sub>1,12</sub> = 7.7   | 0.03 vs. unstim. |
|                      | Slack <sup>-/-</sup> | 0.08 ± 0.01              | 0.06 ± 0.02            |                     |                           |                  |
|                      |                      |                          |                        |                     |                           |                  |
| <b>D</b>             | genotype             | pS831/GluA1 unstimulated | pS831/GluA1 stimulated | n                   | statistics                | p                |
|                      | Slack <sup>+/+</sup> | 0.26 ± 0.06              | 0.24 ± 0.03            | 4                   | F <sub>1,12</sub> = 0.004 |                  |
|                      | Slack <sup>-/-</sup> | 0.24 ± 0.02              | 0.27 ± 0.04            |                     |                           |                  |
|                      |                      |                          |                        |                     |                           |                  |

**Table S7. Oligonucleotides used in this study**

| <b>genotyping</b> |                     |                                                                       |
|-------------------|---------------------|-----------------------------------------------------------------------|
|                   | <b>primer</b>       | <b>sequence 5' to 3'</b>                                              |
| <b>Slack</b>      | for<br>rev1<br>rev2 | AGGGGCTGAGAGGGGTCTCG<br>TGGGTAGGGCTGCCACAAGC<br>GCCACAATCTGTTCTTGGCAC |
| <b>qRT-PCR</b>    |                     |                                                                       |
| <b>GluA1</b>      | for<br>rev          | TGGTGGTGGTGGACTGTGAA<br>GGTTGGCGAGGATGTAGTGG                          |
| <b>GluA2</b>      | for<br>rev          | AGCACTCCTTAGCTTGATTGAGT<br>CCACTTCTTCTCCGCAGCAG                       |
| <b>GluA3</b>      | for<br>rev          | AGAACACCACTGAGAAGCCCT<br>CCTCTGGAGAACTGGGAGCA                         |
| <b>GluA4</b>      | for<br>rev          | CCCAATGCATCTGAAGCCCC<br>TGGCAAACACCCCTCTAGAA                          |
| <b>GluN1</b>      | for<br>rev          | AGGAAGATCATCTGGCCAGGA<br>GGGCTTGACATACACGAAGGG                        |
| <b>GluN2A</b>     | for<br>rev          | GAGACCCCGCTACACACTCT<br>TCAGCACGATCACCACAAGC                          |
| <b>GluN2B</b>     | for<br>rev          | CGCCCAGATCCTCGATTTCA<br>ACTGGAAGAACATGGAGGACTCA                       |
| <b>GluN3A</b>     | for<br>rev          | TGGCTGCTGTCATGGTAGGT<br>CACTGCTTTCCCGGACAGTT                          |
| <b>HPRT</b>       | for<br>rev          | CATTATGCCGAGGATTTGGA<br>CCTTCATGACATCTCGAGCA                          |
| <b>Slack</b>      | for<br>rev          | CTGCTGTGCCTGGTCTTCA<br>AAGGAGGTCAGCAGGTTCAA                           |
| <b>Slick</b>      | for<br>rev          | CTCGCGCTTTCAAAACTGGA<br>ACTCTTCCCGCAGCAAAAGG                          |



**Table S8. Primary antibody information.**

| Target                 | Source           | Catalog #          | Species / Isotype | Figure      |
|------------------------|------------------|--------------------|-------------------|-------------|
| Arc                    | Synaptic Systems | 156 003            | rabbit polyclonal | S3          |
| Ephrin-B3              | Elabscience      | E-AB-31352         | rabbit polyclonal | S3          |
| FMRP                   | Cell Signaling   | 4317               | rabbit polyclonal | S3          |
| GluA1                  | Origene          | TA326534           | mouse IgG1        | 2,4,6       |
| GluA1 <sup>pS845</sup> | Millipore        | AB5849             | rabbit polyclonal | 4,6         |
| GluA1 <sup>pS831</sup> | Cell Signaling   | 75574              | rabbit polyclonal | 4,6         |
| GluA2                  | Cell Signaling   | 13607              | rabbit polyclonal | 2           |
| GluN1                  | Origene          | TA326536           | mouse IgG1        | 2           |
| GluN2A                 | Origene          | TA326537           | mouse IgG2a       | 2           |
| GluN2B                 | Cell Signaling   | 14544              | rabbit polyclonal | 2           |
| GluN3A                 | alomone labs     | AGC-030            | rabbit polyclonal | 2           |
| Ppp1r1a                | Biorybt          | Orb215507          | rabbit polyclonal | S3          |
| PSD-95                 | NeuroMab         | 75-028             | mouse IgG2a       | 2,S3        |
| Rab3b                  | cusabio          | CSB-PA019195LA01HU | rabbit polyclonal | S3          |
| Rab4                   | Cell Signaling   | 2167               | rabbit polyclonal | S3          |
| Rab11                  | Cell Signaling   | 5589               | rabbit polyclonal | S3          |
| Rasa1                  | Elabscience      | E-AB-15329         | rabbit polyclonal | S3          |
| Slack                  | NeuroMab         | 75-051             | mouse IgG1        | 2,S2        |
| Synaptophysin          | Synaptic Systems | 101011             | mouse IgG1        | 2,S3        |
| $\alpha$ -Tubulin      | Cell Signaling   | 3873               | mouse IgG1        | 2,4,6,S2,S3 |

## SUPPLEMENTAL FIGURES AND LEGENDS

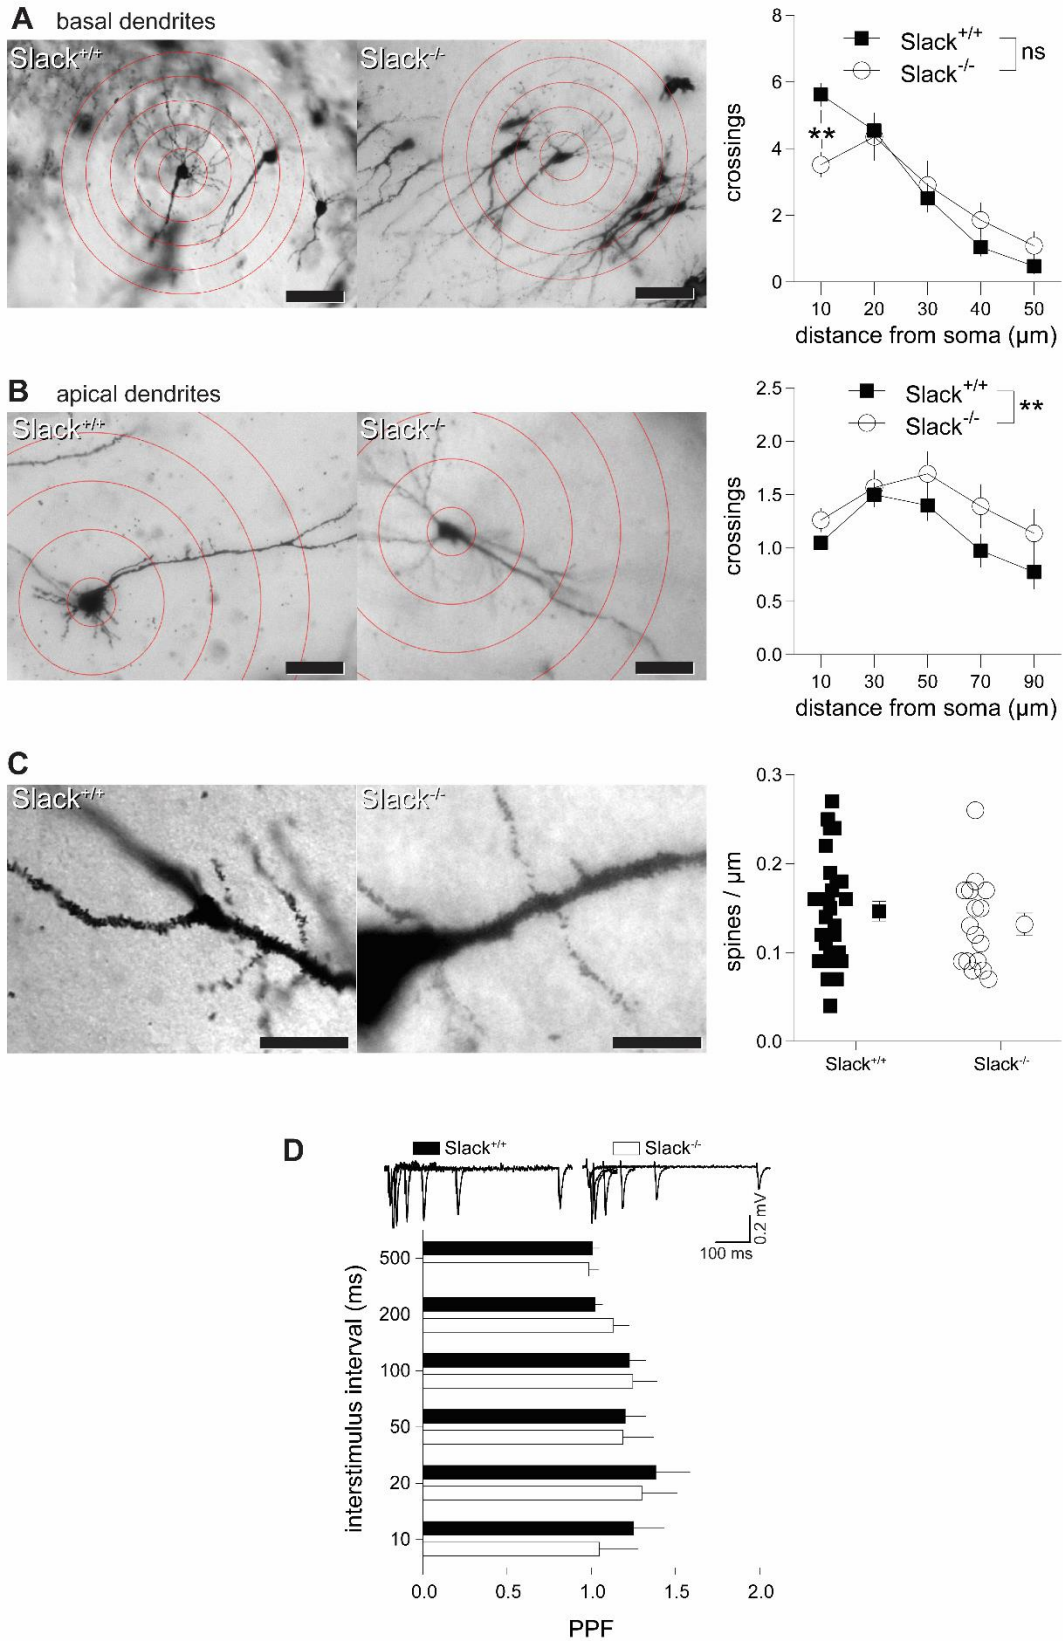

**Figure S1. CA1 pyramidal cell morphology and presynaptic function in infant *Slack*<sup>-/-</sup>.**

(A-C) 150  $\mu\text{m}$  thick forebrain slices from P9 *Slack*<sup>+/+</sup> and *Slack*<sup>-/-</sup> mice were stained using the Golgi-technique. Z-stack images were taken using a 20x objective. Representative images are shown on the left, quantification on the right.

(A) The number of basal dendrites crossing concentric circles at the indicated distance from the soma was overall not different between *Slack*<sup>+/+</sup> (n = 40 cells from 4 preparations) and *Slack*<sup>-/-</sup> (n = 23 cells from 4 preparations) with *Slack*<sup>-/-</sup> dendrites crossing significantly less only at 10  $\mu\text{m}$  from the soma (two-way ANOVA with Sidak's multiple comparisons test,  $F_{1,305} = 0.43$ , n.s. for genotype,  $p < 0.01$  at 10  $\mu\text{m}$ ).

(B) The number of apical dendrites crossing concentric circles at the indicated distance from the soma was significantly (two-way ANOVA,  $F_{1,305} = 6.8$ ,  $p = 0.0096$ ) higher for all distances in *Slack*<sup>-/-</sup> (n = 23 cells from 4 preparations) compared to *Slack*<sup>+/+</sup> (n = 40 cells from 4 preparations).

(C) Spine density on secondary dendrites was determined in Z-stacks taken with a 63x objective. Spine density was not different (unpaired t-test) between *Slack*<sup>+/+</sup> ( $0.147 \pm 0.011 \mu\text{m}^{-1}$ , n = 29 images from 4 preparations) and *Slack*<sup>-/-</sup> ( $0.132 \pm 0.013 \mu\text{m}^{-1}$ , n = 16 from 4 preparations).

(D) Paired-pulse facilitation (PPF) of Schaffer-collateral fEPSP recorded from acute forebrain slices of P6 to P14 *Slack*<sup>+/+</sup> and *Slack*<sup>-/-</sup> mice was not different between *Slack*<sup>+/+</sup> (n = 13 slices from 4 animals) and *Slack*<sup>-/-</sup> (n = 8 slices from 4 animals) for all inter-stimulus intervals. Traces from representative recordings shown on top (*Slack*<sup>+/+</sup>: 10 ms:  $1.2 \pm 0.2$  mV, 20 ms:  $1.4 \pm 0.2$  mV, 50 ms:  $1.2 \pm 0.1$  mV, 100 ms:  $1.2 \pm 0.1$  mV, 200 ms:  $1.02 \pm 0.04$  mV, 500 ms:  $1.01 \pm 0.04$  mV; *Slack*<sup>-/-</sup>: 10 ms:  $1.1 \pm 0.2$  mV, 20 ms:  $1.3 \pm 0.20$  mV, 50 ms:  $1.2 \pm 0.2$  mV, 100 ms:  $1.3 \pm 0.2$  mV, 200 ms:  $1.1 \pm 0.1$  mV, 500 ms:  $1.0 \pm 0.1$  mV).

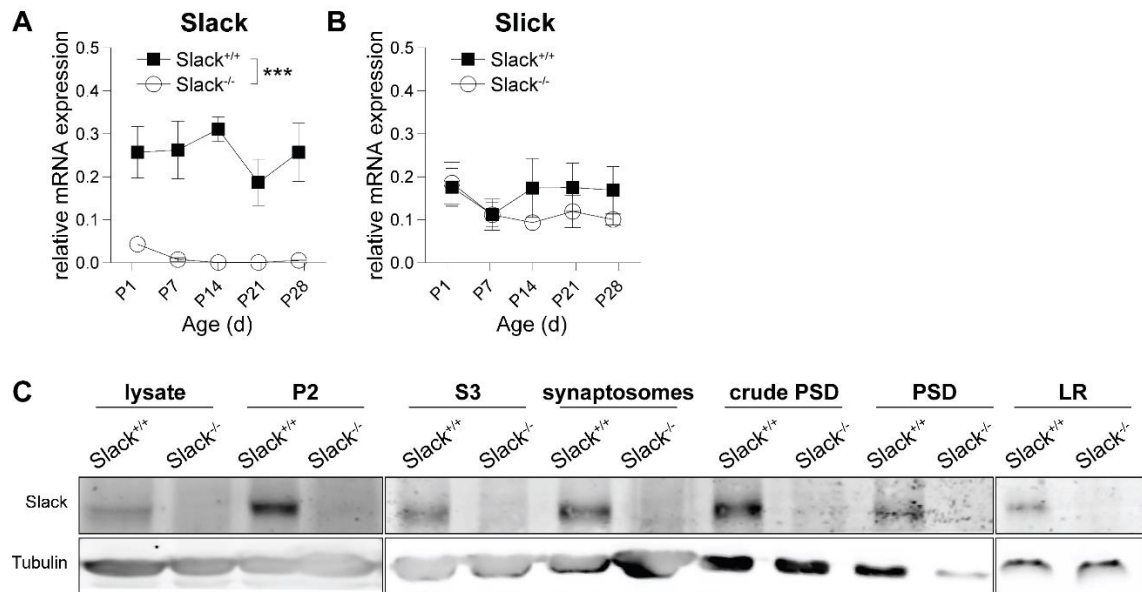

**Figure S2. Unaltered Slick transcript levels in infant *Slack*<sup>-/-</sup> mice and presence of Slack in all biochemical fractions.**

(A-B) Transcript levels were quantified by RT-PCR of mRNA isolated at weekly intervals during the first month of life from the hippocampi of *Slack*<sup>+/+</sup> and *Slack*<sup>-/-</sup> mice. Results were normalized to HPRT and tested for statistical significance by two-way ANOVA with Sidak's multiple comparison test.

(A) Slack transcript levels in *Slack*<sup>+/+</sup> were steady between P1 and P28. Slack transcripts were not detectable in *Slack*<sup>-/-</sup> (n = 6, two-way ANOVA,  $F_{1,42} = 69.1$ ,  $p < 0.001$ ).

(B) Slick transcript levels in *Slack*<sup>+/+</sup> and *Slack*<sup>-/-</sup> did not differ between P1 and P28 (n = 6). Slick transcript levels remained stable during the observed time period.

(C) Representative immunoblots of biochemical fractions isolated from *Slack*<sup>+/+</sup> and *Slack*<sup>-/-</sup> P9 mouse brain tissue showing expression of Slack in lysate, membrane enriched (P2), vesicular supernatant (S3), synaptosomal, crude PSD, PSD and lipid raft (LR) enriched fractions. Loading controls provided by  $\alpha$ -tubulin immunoreactivity.

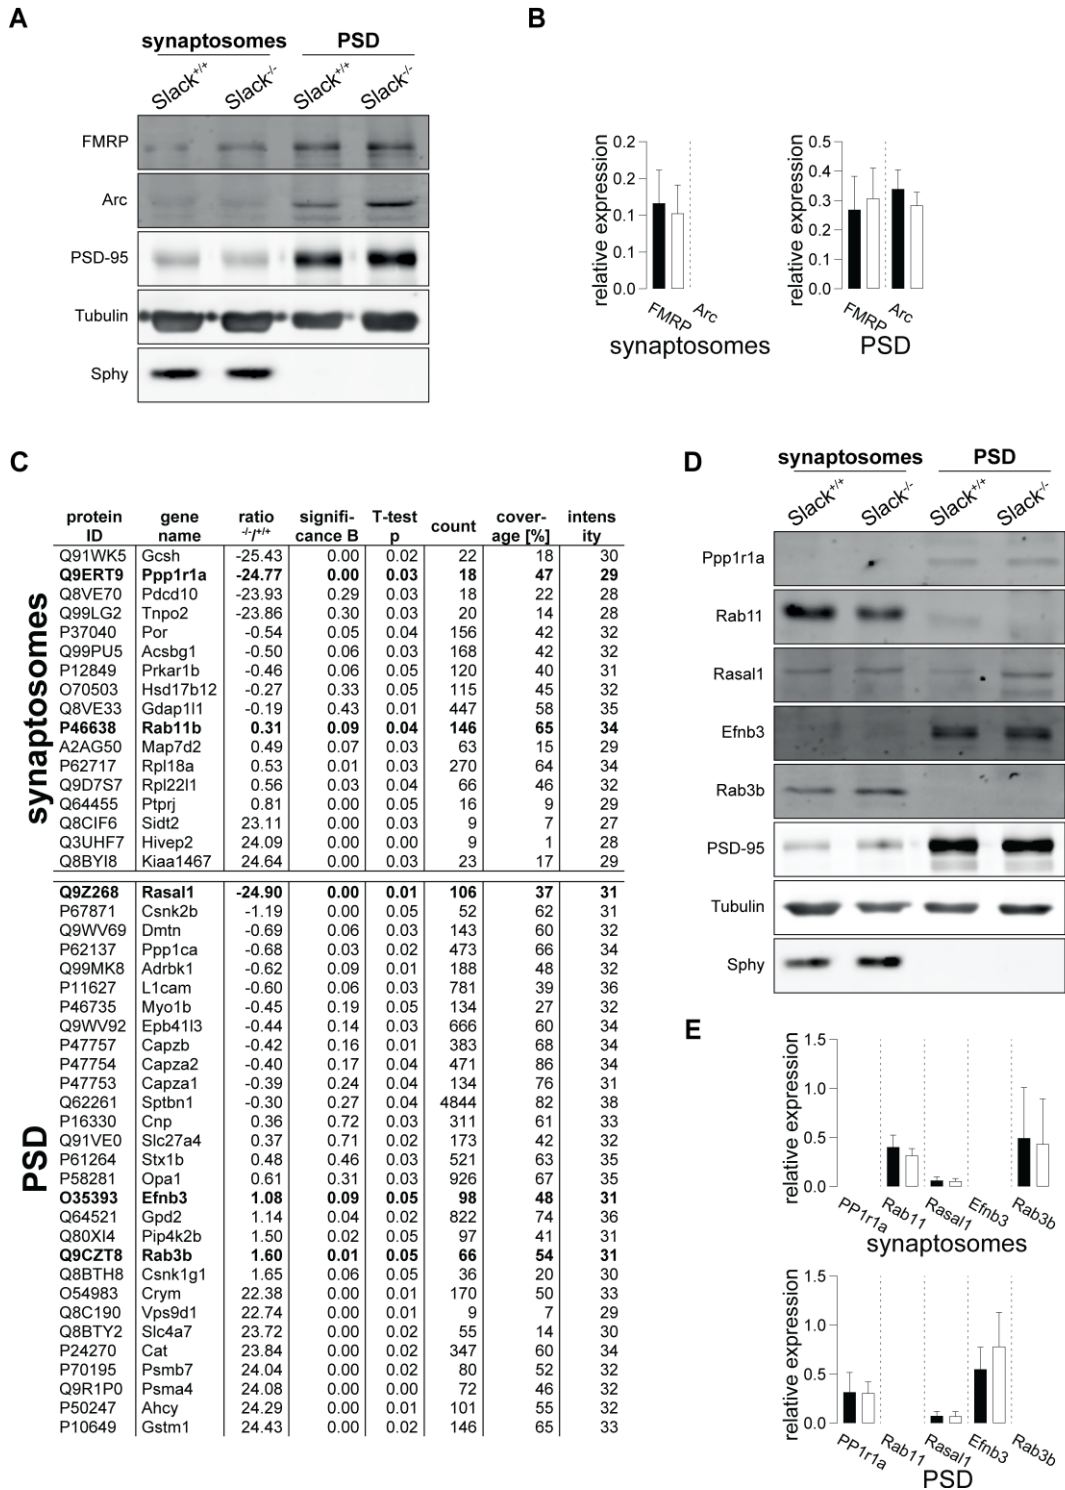

**Figure S3. Synaptosomal and postsynaptic proteome of infant *Slack*<sup>+/+</sup> and *Slack*<sup>-/-</sup>.**

(A) Representative immunoblots of biochemical fractions from P9 *Slack*<sup>+/+</sup> and *Slack*<sup>-/-</sup> forebrains. Synaptosomal and postsynaptic density (PSD) enriched fractions were loaded and probed for activity regulated cytoskeleton associated protein (Arc) and fragile X mental retardation 1 (FMRP).

As control for biochemical fractionation, PSD-95 is enriched in PSD and de-enriched in synaptosomes. Pre-synaptic synaptophysin (Sphy) is absent from PSD and enriched in synaptosomes.

**(B)** Bar diagrams depicting Arc (n = 5) and FMRP (n = 5) protein band intensities normalized to  $\alpha$ -tubulin in synaptosomal (left) and PSD (right) enriched fractions. Note that Arc was not detected in synaptosomal enriched fractions. Statistical significance was tested by paired t-test.

**(C)** Synaptosomal (n = 7 each for *Slack*<sup>+/+</sup> and *Slack*<sup>-/-</sup>) and PSD (*Slack*<sup>+/+</sup>, n = 8; *Slack*<sup>-/-</sup>, n = 6) enriched fractions from biochemical fractionations of P9 *Slack*<sup>+/+</sup> and *Slack*<sup>-/-</sup> forebrains were analyzed using LC/MS-MS. Proteins with a significant alteration in one of the comparisons are sorted by *Slack*<sup>-/-</sup> over *Slack*<sup>+/+</sup> ratio for synaptosomal (top) and PSD enriched (bottom) fractions. Negative ratio indicates down-, positive upregulated proteins. Expression of bold-type proteins was further characterized by Western-blot in D.

**(D)** Representative immunoblots of biochemical fractions from P9 *Slack*<sup>+/+</sup> and *Slack*<sup>-/-</sup> forebrains. Synaptosomal and postsynaptic density (PSD) enriched fractions were loaded and probed for. As control for biochemical fractionation, PSD-95 is enriched in PSD and de-enriched in synaptosomes. Pre-synaptic synaptophysin (Sphy) is absent from PSD and enriched in synaptosomes.

**(E)** Bar diagrams depicting Ppp1r1a (n = 3), Rab11 (n = 5), Rasal1 (n = 3), Efnb3 (n = 4), and Rab3b (n = 5) protein band intensities normalized to  $\alpha$ -tubulin in synaptosomal (left) and PSD (right) enriched fractions. Note that PP1r1a and Efnb3 were not detected in synaptosomal, Rab11 and Rab3b not in PSD enriched fractions. Statistical significance was tested by paired t-test.

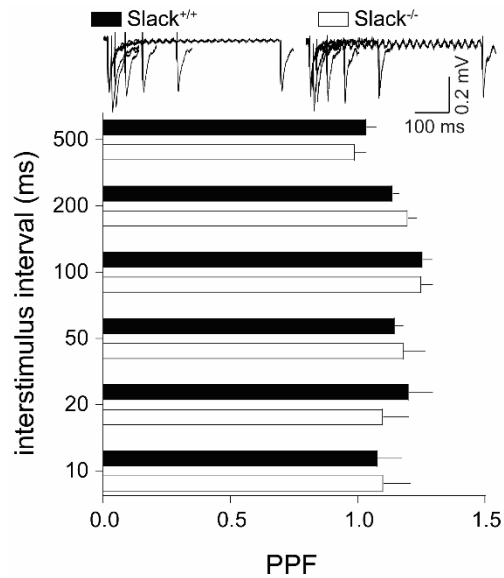

**Figure S4. Normal presynaptic function in adult *Slack*<sup>-/-</sup>.**

Paired-pulse facilitation (PPF) of Schaffer-collateral fEPSP recorded from acute forebrain slices of P8 to P12 *Slack*<sup>+/+</sup> and *Slack*<sup>-/-</sup> mice was not different between *Slack*<sup>+/+</sup> (n = 15 slices from 8 animals) and *Slack*<sup>-/-</sup> (n = 10 slices from 3 animals) for all inter-stimulus intervals. Traces from representative recordings shown on top (*Slack*<sup>+/+</sup>: 10 ms: 1.1 ± 0.10 mV, 20 ms: 1.2 ± 0.09 mV, 50 ms: 1.1 ± 0.03 mV, 100 ms: 1.3 ± 0.04 mV, 200 ms: 1.1 ± 0.03 mV, 500 ms: 1.0 ± 0.04 mV; *Slack*<sup>-/-</sup>: 10 ms: 1.1 ± 0.11 mV, 20 ms: 1.1 ± 0.10 mV, 50 ms: 1.2 ± 0.09 mV, 100 ms: 1.3 ± 0.04 mV, 200 ms: 1.2 ± 0.04 mV, 500 ms: 1.0 ± 0.4 mV).

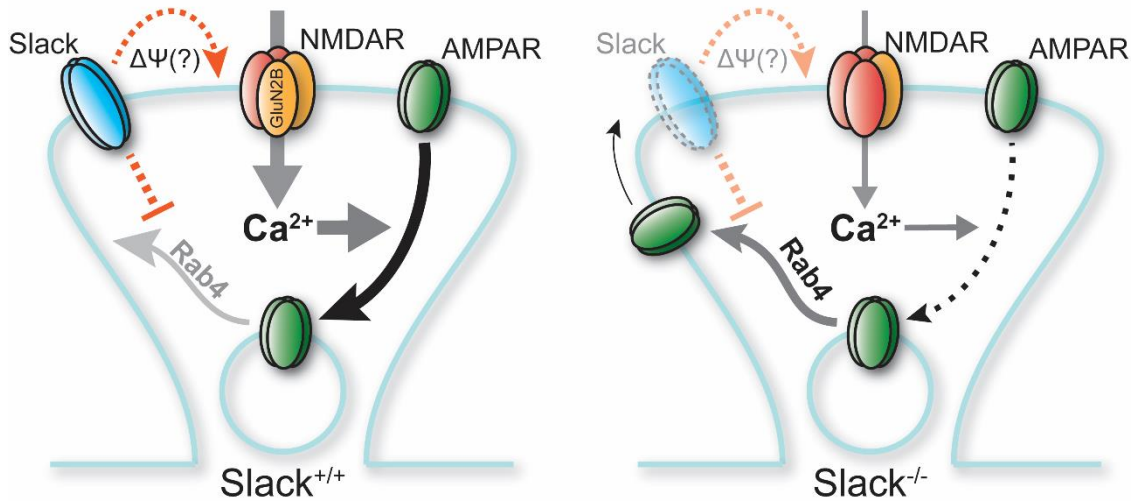

**Figure S5. Model of Slack influencing hippocampal synaptic plasticity in neonates.**

In wildtype *Slack*<sup>+/+</sup> mice (left panel), Slack promotes NMDAR-mediated AMPAR endocytosis by an unknown mechanism (pointed red arrow) which might be related to membrane repolarization, while suppressing Rab4-supported rapid recycling of AMPAR (red blocking arrow). In *Slack*<sup>-/-</sup>, however, lacking amplification of NMDAR function prevents effective AMPAR endocytosis while increased Rab4 function might accelerate rapid recycling of newly-endocytosed AMPAR back to the plasma membrane, from where they can again enter the PSD. Additionally, NMDAR in infant *Slack*<sup>-/-</sup> contain less GluN2B than in *Slack*<sup>+/+</sup>.
